# Supplementary material for: Photo fermentative biohydrogen production potential using microalgae–activated sludge co-digestion in a sequential flow batch reactor (SFBR)
Source: Royal Society of Chemistry journal article supplement (doi:10.1039/d2ra06014k), 2022-01-01
Supplement: d2ra06014k1.pdf [file d2ra06014k1.pdf]

**Photo fermentative biohydrogen production potential using microalgae-activated sludge  
co-digestion in sequential flow batch reactor (SFBR)†**

Muhammad Asad Javed <sup>ab</sup> and Ashraf Aly Hassan <sup>1ab</sup>

<sup>a</sup> Department of Civil and Environmental Engineering, United Arab Emirates University, Al  
Ain 15551, UAE; [201990206@uaeu.ac.ae](mailto:201990206@uaeu.ac.ae), [alyhassan@uaeu.ac.ae](mailto:alyhassan@uaeu.ac.ae)

<sup>b</sup> National Water and Energy Center, United Arab Emirates University, Al Ain 15551, UAE

---

<sup>1</sup> Department of Civil and Environmental Engineering, United Arab Emirates University, Al Ain 15551, UAE.  
e-mail: [alyhassan@uaeu.ac.ae](mailto:alyhassan@uaeu.ac.ae)

**Figure S1**

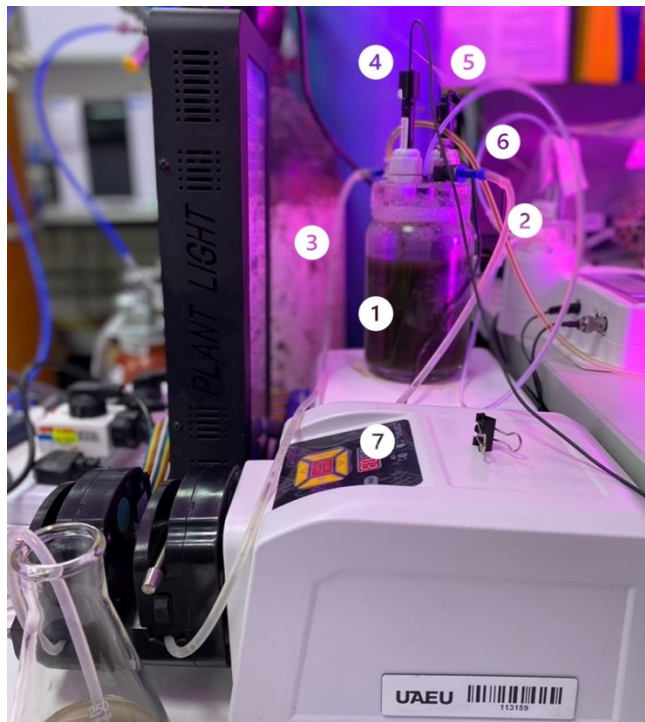

1. SFBR
2. Influent
3. Effluent
4. H<sub>2</sub> microsensor
5. pH controller
6. Gas port
7. Peristaltic pump

Figure S1.

**Table S1. Nutrients for Z-medium**

| <b>Component</b>                                     | <b>Stock Solution<br/>(g/L dH<sub>2</sub>O)<sup>2</sup></b> | <b>Quantity Used<br/>(to 1 litre)</b> |
|------------------------------------------------------|-------------------------------------------------------------|---------------------------------------|
| NaNO <sub>3</sub>                                    | 46.7                                                        | 10 ml                                 |
| Ca(NO <sub>3</sub> ) <sub>2</sub> ·4H <sub>2</sub> O | 5.9                                                         | 10 ml                                 |
| K <sub>2</sub> HPO <sub>4</sub>                      | 3.1                                                         | 10 ml                                 |
| MgSO <sub>4</sub> ·7H <sub>2</sub> O                 | 2.5                                                         | 10 ml                                 |
| Na <sub>2</sub> CO <sub>3</sub>                      | 2.1                                                         | 10 ml                                 |
| Fe-EDTA solution                                     | see following recipe                                        | 0.2 ml                                |
| Trace metals solution                                | see following recipe                                        | 0.08 ml                               |

---

**Fe-EDTA solution**

---

| <b>Component</b>                     | <b>Quantity Used (to<br/>250 mL dH<sub>2</sub>O)</b> |
|--------------------------------------|------------------------------------------------------|
| HCl (35%)                            | 2.2 ml                                               |
| FeCl <sub>3</sub> ·6H <sub>2</sub> O | 4.5 g                                                |
| Na <sub>2</sub> EDTA                 | 4.65 g                                               |

---

**Trace metals solution**

---

| <b>Component</b>                                                     | <b>Quantity Used (to<br/>250 mL dH<sub>2</sub>O)</b> |
|----------------------------------------------------------------------|------------------------------------------------------|
| H <sub>3</sub> BO <sub>3</sub>                                       | 0.775 g                                              |
| MnSO <sub>4</sub> ·4H <sub>2</sub> O                                 | 0.4225 g                                             |
| Na <sub>2</sub> WO <sub>4</sub> ·2H <sub>2</sub> O                   | 0.022 g                                              |
| (NH <sub>4</sub> ) <sub>6</sub> MoO <sub>24</sub> ·4H <sub>2</sub> O | 0.0297 g                                             |
| KBr                                                                  | 0.044 g                                              |
| ZnSO <sub>4</sub> ·H <sub>2</sub> O                                  | 0.0365 g                                             |
| Co(NO <sub>3</sub> ) <sub>2</sub> ·6H <sub>2</sub> O                 | 0.03125 g                                            |
| CuSO <sub>4</sub> ·5H <sub>2</sub> O                                 | 0.0592 g                                             |
| AlK(SO <sub>4</sub> ) <sub>2</sub> ·12H <sub>2</sub> O               | 0.775 g                                              |

---

<sup>2</sup> dH<sub>2</sub>O as deionized or distilled water

**Table S2. Nutrients for TAP medium**

| <b>Component</b>                   | <b>Amount Used<br/>(to 2 litre)</b> | <b>Stock Solution<br/>Recipe</b>                                                   | <b>Amount</b> |
|------------------------------------|-------------------------------------|------------------------------------------------------------------------------------|---------------|
| Beijerinck's Solution              | 100 mL                              |                                                                                    |               |
|                                    |                                     | NH <sub>4</sub> Cl                                                                 | 8 g/L         |
|                                    |                                     | CaCl <sub>2</sub> .2H <sub>2</sub> O                                               | 1 g/L         |
|                                    |                                     | MgSO <sub>4</sub> .7H <sub>2</sub> O                                               | 2 g/L         |
| Phosphate Buffer Stock<br>Solution | 17 mL                               |                                                                                    |               |
|                                    |                                     | Na <sub>2</sub> HPO <sub>4</sub>                                                   | 11.62 g/L     |
|                                    |                                     | KH <sub>2</sub> PO <sub>4</sub>                                                    | 7.26 g/L      |
| Hunter's Trace Stock<br>Solution   | 2 mL                                |                                                                                    |               |
|                                    |                                     | Na <sub>2</sub> EDTA.2H <sub>2</sub> O                                             | 50 g/L        |
|                                    |                                     | ZnSO <sub>4</sub> .7H <sub>2</sub> O                                               | 22 g/L        |
|                                    |                                     | H <sub>3</sub> BO <sub>3</sub>                                                     | 11.4 g/L      |
|                                    |                                     | MnCl <sub>2</sub> .4H <sub>2</sub> O                                               | 5.1 g/L       |
|                                    |                                     | FeSO <sub>4</sub> .7H <sub>2</sub> O                                               | 5 g/L         |
|                                    |                                     | CoCl <sub>2</sub> .6H <sub>2</sub> O                                               | 1.6 g/L       |
|                                    |                                     | CuSO <sub>4</sub> .5H <sub>2</sub> O                                               | 1.16 g/L      |
|                                    |                                     | (NH <sub>4</sub> ) <sub>6</sub> Mo <sub>7</sub> O <sub>24</sub> .4H <sub>2</sub> O | 1.1 g/L       |
| Tris Acetate Stock<br>Solution     | 20 mL                               |                                                                                    |               |
|                                    |                                     | Trisma Base                                                                        | 121 g/500 mL  |
|                                    |                                     | Glacial Acetic Acid                                                                | 50 mL/500 mL  |
